# Supplementary material for: Novel zeotype frameworks with soft cyclodiphosphazane linkers and soft Cu4X4 clusters as nodes
Source: Royal Society of Chemistry journal article supplement (doi:10.1039/c4cc03810j), 2014-01-01
Supplement: c4cc03810j1.pdf [file c4cc03810j1.pdf]

## Supporting information

### **Novel Zeotype Frameworks with Soft Cyclodiphosphazane Linkers and Soft Cu<sub>4</sub>X<sub>4</sub> Clusters as Nodes**

Mujahuddin M. Siddiqui,<sup>a</sup> Shaikh M. Mobin,<sup>b</sup> Irena Senkowska,<sup>c</sup> Stefan Kaskel<sup>c</sup> and Maravanji S. Balakrishna<sup>\*a</sup>

a *Organophosphorus and Homogeneous Catalysis Laboratory, Department of Chemistry, Indian Institute of Technology Bombay, Powai, Mumbai 400076, India.*

b *Discipline of Chemistry, School of Basic Sciences, IIT Indore, Indore 452017, India.*

c *Department of Inorganic Chemistry, Technische Universität Dresden, Bergstr.66, 01062 Dresden, Germany.*

#### **Experimental details**

All manipulations were performed using standard vacuum line and Schlenk technique under nitrogen atmosphere unless otherwise stated. All the solvents were purified by conventional procedures and distilled prior to use. The compounds *cis*-[CIP(μ-N<sup>i</sup>Bu)]<sub>2</sub>,<sup>1</sup> and CuBr<sup>2</sup> were prepared according to published procedures. CuI and ferrocene were purchased from Aldrich Chemicals and used as such without further purification.

#### **Instrumentation**

The microanalyses were performed using a Carlo Erba model 1112 elemental analyzer. Thermogravimetric analysis was carried out using a Perkin-Elmer Pyris thermal analysis system, under a stream of N<sub>2</sub> gas at a heating rate of 10 °C/min. Powder X-ray diffraction (PXRD) measurements were performed on a STADI P diffractometer with Cu-Kα radiation in the 2θ range 2-50° at room temperature. Nitrogen physisorption isotherms were measured at 77 K up to 1 bar using a BELSORP-max (BEL Japan, Inc.) apparatus. The BET areas were calculated in the pressure range 0.02 – 0.07 for **1** and 0.04 – 0.1 for **2**. The pore volumes were calculated at p/p<sub>0</sub> 0.90. Water and methanol vapor physisorption isotherms were measured at 298 K using Hydrosorb apparatus (Quantachrome Co.).

The  $^1\text{H}$  and  $^{31}\text{P}\{^1\text{H}\}$  NMR spectra were recorded using either Varian VXR 400 or Bruker AV 400 spectrometers operating at appropriate frequencies using tetramethylsilane(TMS) and 85%  $\text{H}_3\text{PO}_4$ , as internal and external references, respectively. The dispersions of **1** and **2** in  $\text{dmso}-d_6$  in a NMR tube were sonicated for 10-15 minutes before recording the NMR spectra.

UV-vis spectra were recorded on a Hitachi U-4100 UV-Vis spectrophotometer. The dispersion of **1** and **2** in degassed acetonitrile was sonicated for 10-15 minutes, the saturated solutions obtained by filtration were used for UV-vis studies.

### **Electrochemical studies:**

Cyclic voltammetric measurements were performed using a CHI 6089d electrochemistry workstation system with glassy carbon (GC) as working electrode, platinum wire as auxiliary electrode and aqueous saturated calomel reference electrode (SCE) in a three electrode system. To assess the solid state electrochemical behavior, glassy carbon electrode was immobilized with direct adsorption of these compounds following a literature method.<sup>4</sup> A few microliters of ethanolic suspension of **1** or **2** were deposited on the GC electrode and allowed to dry in air at room temperature, followed by the addition of 10 $\mu\text{L}$  ethanolic solution of Nafion (5%) and drying at room temperature.

### **X-ray crystallography.**

Single crystal X-ray structural studies of **1** and **2** were performed on a CCD Agilent Technologies (Oxford Diffraction) SUPER NOVA diffractometer. Data were collected at 150(2) K using graphite-monochromated Mo  $\text{K}\alpha$  radiation ( $\lambda_\alpha = 0.71073 \text{ \AA}$ ). The strategy for the data collection was evaluated using the CrysAlisPro CCD software. The data were collected by the standard 'phi-omega scan' techniques, and were scaled and reduced using CrysAlisPro RED software. The structures were solved by direct methods using SHELXS-97 and refined by full matrix least-squares with SHELXL-97, refining on  $F^2$ .<sup>5</sup>

The positions of all the atoms were obtained by direct methods. All non-hydrogen atoms were refined anisotropically. The remaining hydrogen atoms were placed in geometrically

constrained positions and refined with isotropic temperature factors, generally  $1.2U_{eq}$  of their parent atoms.

### Synthesis of [ $\{\text{Cu}_4\text{Br}_4\}\{\text{Fe}(\eta^5\text{-C}_5\text{H}_4)_2(\text{PN}^t\text{Bu})_2\}_2\}_n$ (**1**)

A solution of CuBr (22.1 mg, 0.154 mmol) in acetonitrile (10 mL) was layered slowly on the solution of  $[\text{Fe}(\eta^5\text{-C}_5\text{H}_4)_2(\text{PN}^t\text{Bu})_2]$  (30 mg, 0.077 mmol) in dichloromethane (10 mL) and the solution was kept aside for 24h to obtain reddish block crystals of **1**. Yield: 77 % (0.039 g). Anal. Calcd. for  $\text{C}_{18}\text{H}_{26}\text{N}_2\text{P}_2\text{FeCu}_2\text{Br}_2$ : C, 32.02; H, 3.88; N, 4.14. Found: C, 32.43; H, 3.45; N, 4.72 %.  $^1\text{H}$  NMR (400 MHz, DMSO- $d_6$ ):  $\delta$  1.40 (s, 18H,  $^t\text{Bu}$ ), 4.27 (s, 4H, Cp), 4.37 (s, 4H, Cp).  $^{31}\text{P}\{^1\text{H}\}$  NMR(161.9 MHz, DMSO- $d_6$ ):  $\delta$  137.1 (s).

### Synthesis of [ $\{\text{Cu}_4\text{I}_4\}\{\text{Fe}(\eta^5\text{-C}_5\text{H}_4)_2(\text{PN}^t\text{Bu})_2\}_2\}_n$ (**2**)

Compound **2** was synthesized by a procedure similar to that, used for the synthesis of **1** utilizing CuI (28.4 mg, 0.149 mmol) and  $[\text{Fe}(\eta^5\text{-C}_5\text{H}_4)_2(\text{PN}^t\text{Bu})_2]$  (29 mg, 0.074 mmol). Yield: 90% (0.051 g). Anal. Calcd for  $\text{C}_{18}\text{H}_{26}\text{N}_2\text{P}_2\text{FeCu}_2\text{I}_2$ : C, 28.43; H, 2.87; N, 6.03. Found: C, 28.8; H, 2.93; N, 5.62%.  $^1\text{H}$  NMR (400 MHz, DMSO- $d_6$ ):  $\delta$  1.43 (s, 18H,  $^t\text{Bu}$ ), 4.33 (s, 4H, Cp), 4.41 (s, 4H, Cp).  $^{31}\text{P}\{^1\text{H}\}$  NMR(161.9 MHz, DMSO- $d_6$ ):  $\delta$  143.3 (s).

## Supporting Figures

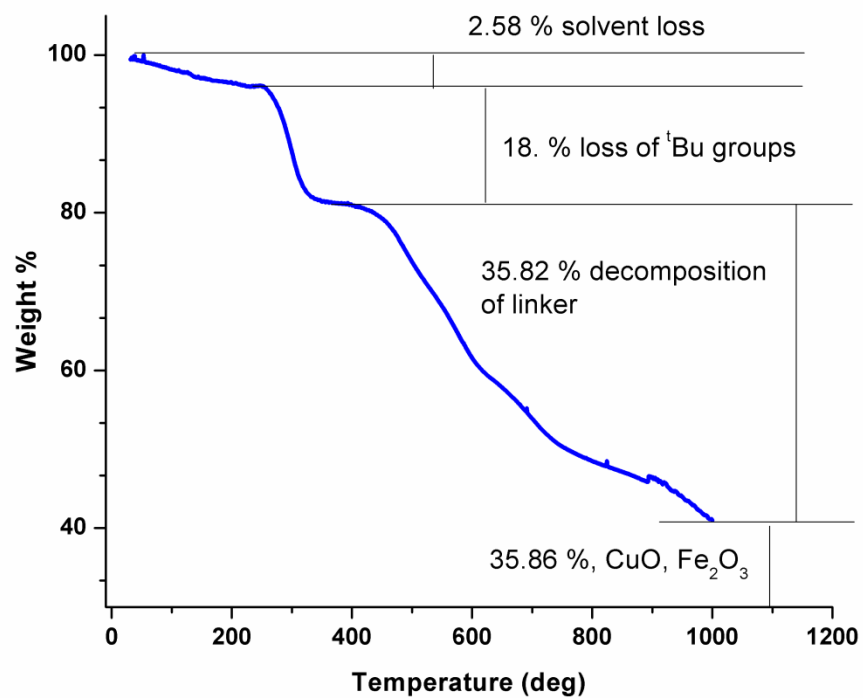

**Figure S1.** Thermal gravimetric analysis of **1**.

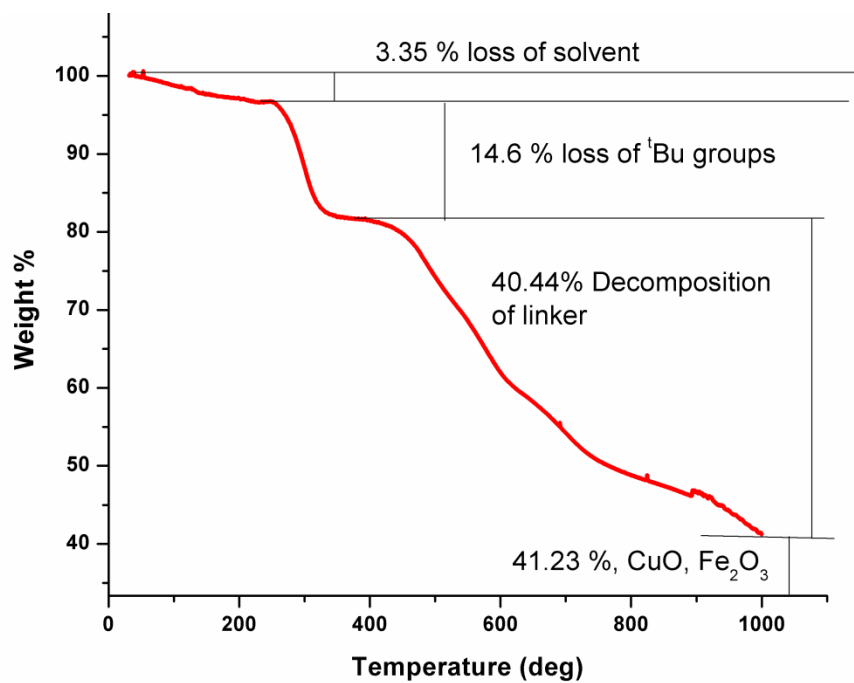

**Figure S2.** Thermal gravimetric analysis of **2**.

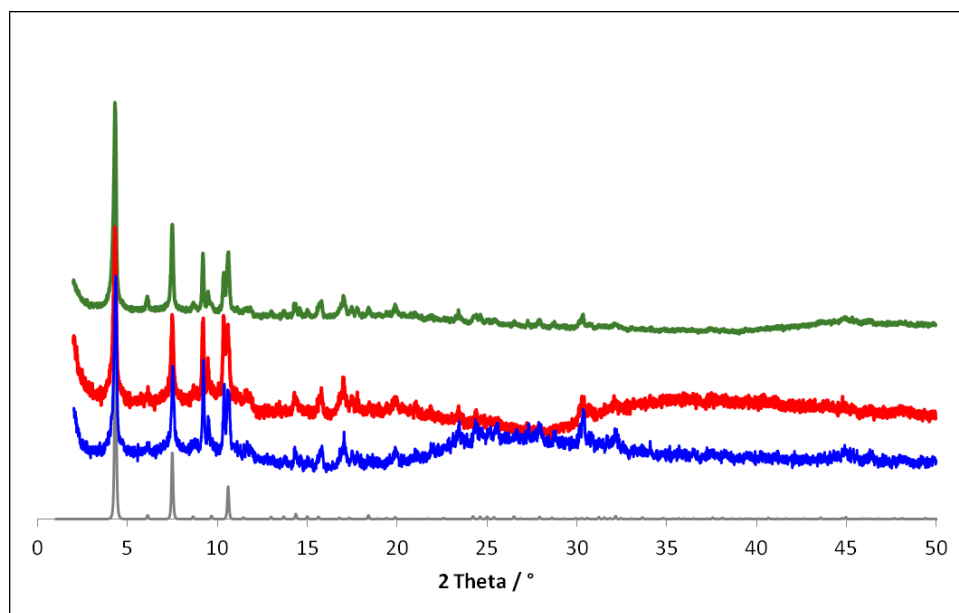

**Figure S3.** The XRD patterns of compound **1**: Calculated in gray, as synthesized in blue, activated at 80 °C in red, and supercritically dried in green. (Some extra peaks observed may be due to the presence of some non identified material).

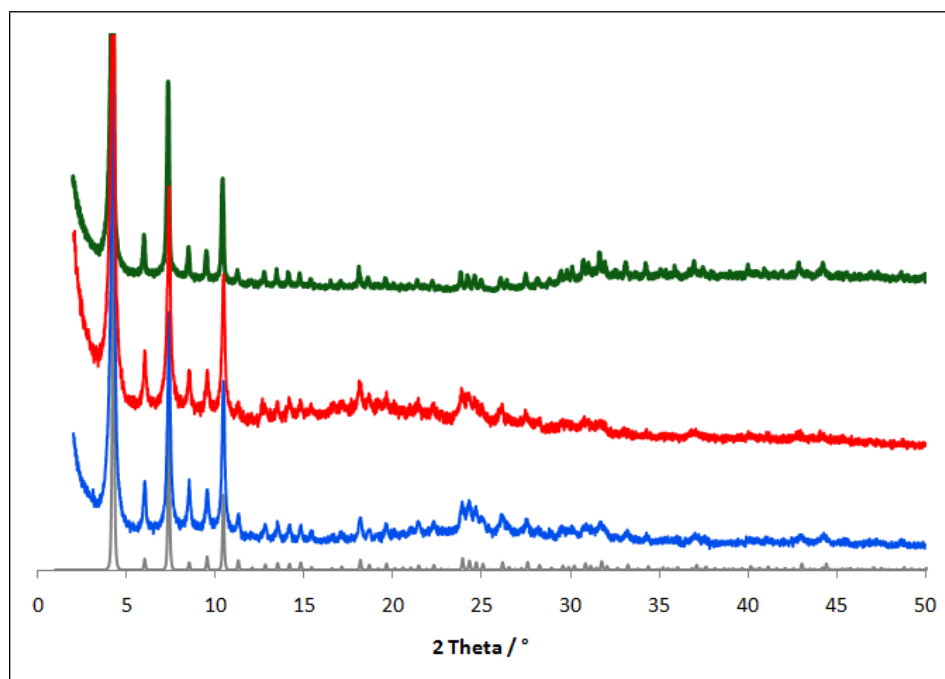

**Figure S4.** The XRD patterns of compound **2**: Calculated in gray, as synthesized in blue, activated at 80 °C in red, and supercritically dried in green.

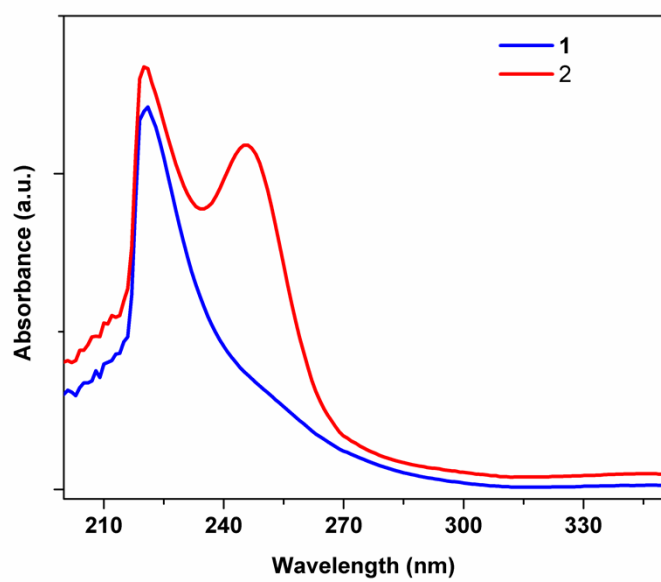

**Figure S5.** UV-Visible spectra of **1** and **2** in CH<sub>3</sub>CN.

MSB-MM-86-CuBr-P31

137.15

NAME MSB-MM-86-CuBr-P31  
EXPNO 10  
PROCNO 1  
Date\_ 20110307  
Time 14.53  
INSTRUM spect  
PROBHD 5 mm PABBO BB-  
PULPROG zgpg30  
TD 65536  
SOLVENT DMSO  
NS 500  
DS 2  
SWH 78125.000 Hz  
FIDRES 1.192093 Hz  
AQ 0.4194804 sec  
RG 456  
DW 6.400 usec  
DE 6.50 usec  
TE 295.3 K  
D1 1.00000000 sec  
D11 0.03000000 sec  
TD0 1

----- CHANNEL f1 -----  
NUC1 31P  
P1 8.40 usec  
PL1 -1.00 dB  
PL1W 29.72541046 W  
SFO1 161.9757550 MHz

----- CHANNEL f2 -----  
CPOPRG2 waltz16  
NUC2 1H  
PCPD2 80.00 usec  
PL2 -1.00 dB  
PL12 14.50 dB  
PL13 14.50 dB  
PL2W 10.56200695 W  
PL12W 0.29767781 W  
PL13W 0.29767781 W  
SFO2 400.1316005 MHz  
SI 32768  
SF 161.9755930 MHz  
WDW EM  
SSB 0  
LB 20.00 Hz  
GB 0  
PC 1.00

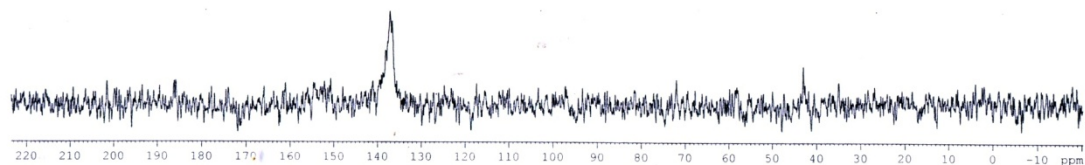

Figure S6.  $^{31}\text{P}\{^1\text{H}\}$  NMR spectrum of **1**.

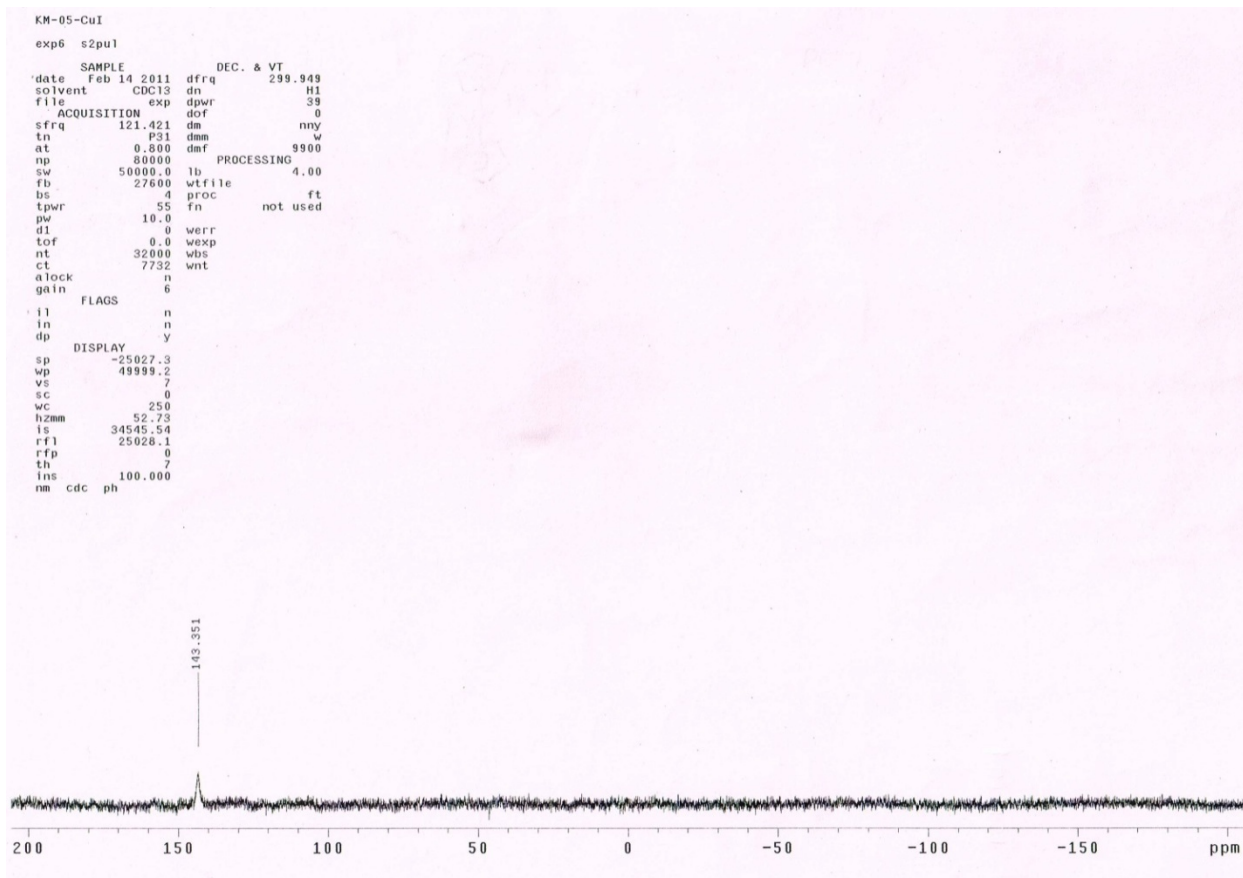

**Figure S7.**  $^{31}\text{P}\{^1\text{H}\}$  NMR spectrum of **2**.

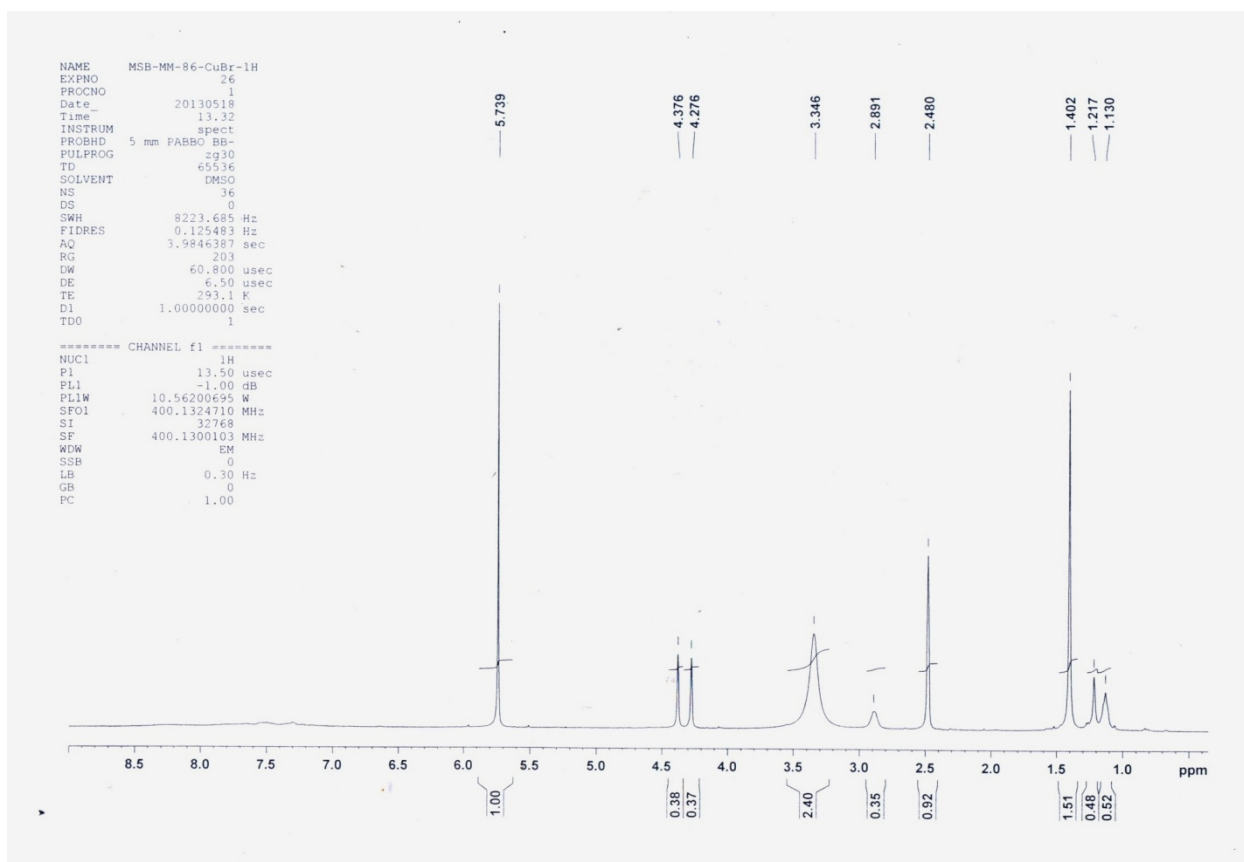

**Figure S8.**  $^1\text{H}$  NMR spectrum of **1**.

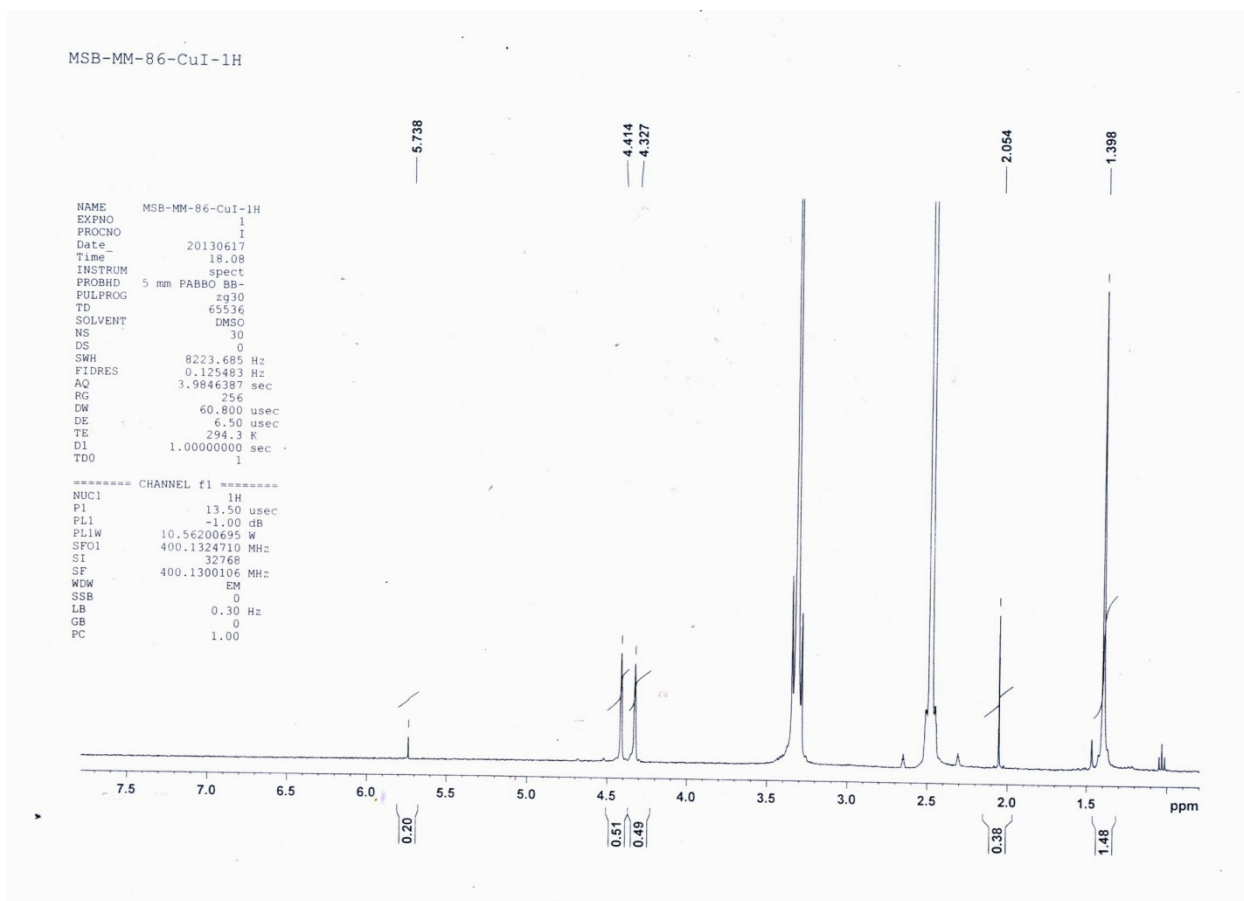

**Figure S9.**  $^1\text{H}$  NMR spectrum of **2**.

## References

1. A. Bashall, E. L. Doyle, C. Tubb, S. J. Kidd, M. McPartlin, A. D. Woods, D. S. Wright, *Chem. Commun.* 2001, 2542-2543.
2. B. S. Furniss, A. J. Hannaford, P. W. G. Smith, A. R. Tatchell, *Vogel's Textbook of Practical Organic Chemistry*, 5th ed.; ELBS: London, England, 1989; pp 428-429.
3. B. Nohra, H. El Moll, L. M. Rodriguez Albelo, P. Mialane, J. Marrot, C. Mellot-Draznieks, M. O'Keeffe, R. Ngo Biboum, J. I. Lemaire, B. Keita, L. Nadjio, A. Dolbecq, *J. Am. Chem. Soc.* 2011, **133**, 13363-13374.
4. G. M. Sheldrick, *Acta Crystallogr., Sect. A* 2008, **A64**, 112-122. *Program for Crystal Structure Solution and Refinement*; University of Goettingen: Goettingen, Germany, 1997.
